# Supplementary material for: Probiotics Dietary Supplementation for Modulating Endocrine and Fertility Microbiota Dysbiosis
Source: MDPI journal article supplement (doi:10.3390/nu12030757), 2020-03-13
Supplement: s1 [file s1]

**Supplementary Table 1.** Summary of the effects of probiotics on animal's fertility disorders and their outcomes.

| Reference                | Population characteristics | Probiotic strain                                                                    | Doses and Administration pattern                                                                    | Period of intervention (Weeks) | Disease              | Results: Clinical parameters variability                                                                                                                                                   |
|--------------------------|----------------------------|-------------------------------------------------------------------------------------|-----------------------------------------------------------------------------------------------------|--------------------------------|----------------------|--------------------------------------------------------------------------------------------------------------------------------------------------------------------------------------------|
| Lagenaur et al. (2011)   | 4 <i>Macaca mulatta</i>    | <i>Lactobacillus jensenii</i> 1153-1646                                             | Group 1: $1 \times 10^9$ CFU/day by intragastric gavage<br>Group 2: $2 \times 10^8$ CFU/day by food | Group 1: 1<br>Group 2: 3- 4    | Intestinal barrier   | The gastrointestinal tract serves as a reservoir for lactobacilli that colonize the vagina. Vaginal colonization may be achieved in humans by oral delivery methods.                       |
| Kiess et al. (2016)      | 30 Roosters                | <i>Lactobacillus acidophilus</i> ATCC 314                                           | $1 \times 10^7$ CFU/day                                                                             | 2                              | Sperm quality        | If Lactobacilli reaches high enough concentrations in the cloaca, then sperm quality may be impacted which could lead to poor fertility.                                                   |
| dos Santos et al. (2018) | 42 Roosters                | <i>Bacillus subtilis</i> QST 713                                                    | $4.5 \times 10^4$ CFU/g of feed ad libitum                                                          | 4                              | Sperm quality        | There are no negative effects on fertility.                                                                                                                                                |
| Valcarce et al. (2019)   | 12 male <i>Danio rerio</i> | <i>Lactobacillus rhamnosus</i> CECT8361<br>y <i>Bifidobacterium longum</i> CECT7347 | $1 \times 10^9$ CFU/day                                                                             | 3                              | Sperm quality        | Increased sperm concentration, total motility, progressive motility, and fast spermatozoa subpopulations. Also, showed different behavior patterns indicating a lower stress-like conduct. |
| Itoh et al. (2011)       | 28 BALB/C Mice             | <i>L. gasseri</i> OLL2809 (heat-killed)                                             | $10 \times 10^8$ CFU/day                                                                            | 3                              | Endometriosis        | Suppression development of endometriosis via activation of NK cells.                                                                                                                       |
| Qin et al. (2013)        | <i>Danio rerio</i>         | <i>Lactobacillus rhamnosus</i> CICC 6141 // <i>Lactobacillus casei</i> BL23         | $1 \times 10^8$ cells/g of basal diet, twice per day                                                | 4                              | Reproductive process | Stimulates (either separately or in combination) follicle maturation, enhance fecundity, and improve egg quality in zebrafish.                                                             |
| Takahashi et al. (2007)  | 6 Piglets                  | <i>Lactobacillus plantarum</i> Lq80                                                 | $1 \times 10^{10}$ CFU/day                                                                          | 2                              | Microbiota dysbiosis | Stimulates the growth of lactobacilli.                                                                                                                                                     |

|                         |                     |                                                                         |                                                        |    |                              |                                                                                                                                                                                                                           |
|-------------------------|---------------------|-------------------------------------------------------------------------|--------------------------------------------------------|----|------------------------------|---------------------------------------------------------------------------------------------------------------------------------------------------------------------------------------------------------------------------|
| Treven et al. (2015)    | 45 FVB/NHanHsd Mice | <i>Lactobacillus gasseri</i> K7 // <i>Lactobacillus rhamnosus</i> GG    | $3.6 \times 10^8$ CFU/day // $4.1 \times 10^8$ CFU/day | 1  | Microbiota and translocation | Both probiotics can modulate the bacterial composition of the microbiota in mesenteric lymph nodes and mammary gland so that it could improve the health of the mammary gland and, ultimately, the health of the newborn. |
| de Andrés et al. (2017) | 11 Balb/C Mice      | <i>Lactococcus lactis</i> MG1614 // <i>Lactobacillus salivarius</i> PS2 | $\sim 10^9$ CFU/day                                    | ~3 | Translocation pathways       | Physiological translocation of maternal bacteria during pregnancy and lactation may contribute to the composition of the mammary and milk microbiota.                                                                     |

2

3 **Supplementary Table 2.** Summary of the effects of probiotics founds on systematics reviews.

|                       |                        |                                                      |                                                                                                            |   |                   |                                                                                                                                                                  |
|-----------------------|------------------------|------------------------------------------------------|------------------------------------------------------------------------------------------------------------|---|-------------------|------------------------------------------------------------------------------------------------------------------------------------------------------------------|
| Falagas et al. (2007) | 42 Healthy women       | <i>L. rhamnosus</i> GR-1 y <i>L. fermentum</i> RC-14 | Grupo 1: $8 \times 10^8$ CFU/day<br>Grupo 2: $1.6 \times 10^9$ CFU/day<br>Grupo 3: $6 \times 10^9$ CFU/day | 4 | Vaginal dysbiosis | This study confirms the potential efficacy of orally administered lactobacilli as a means to restore and maintain a normal urogenital microbiota.                |
|                       | 64 Healthy women       | <i>L. rhamnosus</i> GR-1 y <i>L. fermentum</i> RC-15 | $>10^9$ CFU/day                                                                                            | 8 | Vaginal dysbiosis | The combination probiotics is safe for daily use in healthy women, and also it can reduce colonization of the vagina by possible pathogenic bacteria and yeasts. |
|                       | 59 Premenopausal women | <i>L. rhamnosus</i> GR-1 y <i>L. fermentum</i> RC-16 | $>10^9$ CFU/day                                                                                            | 8 | Vaginal dysbiosis | Improvement of the vaginal microbiota towards intermediate or normal Nugent scores.                                                                              |

4
